# Supplementary material
Source: Springer Nature journal article supplement (https://www.springermedizin.de/resource/supplementary/12879_2012_2396_MOESM4_ESM.pdf/9444494)

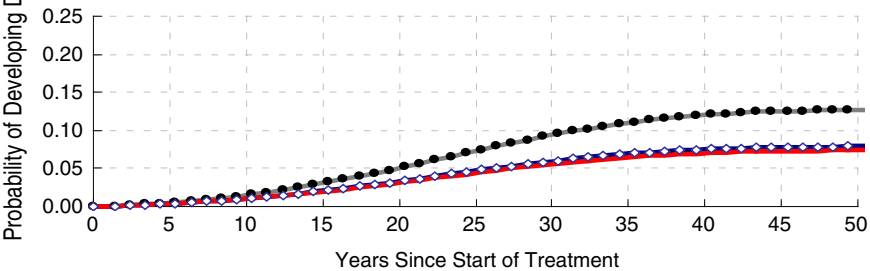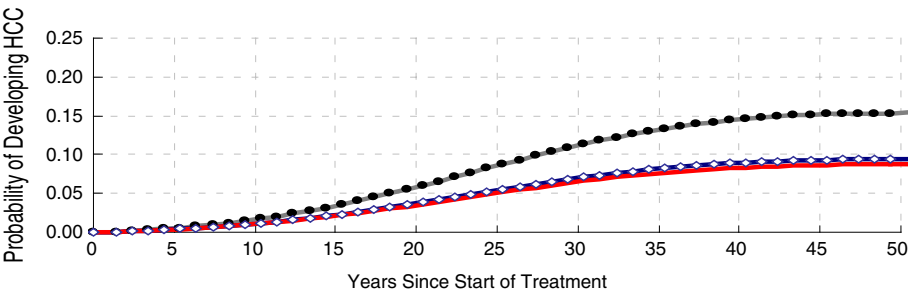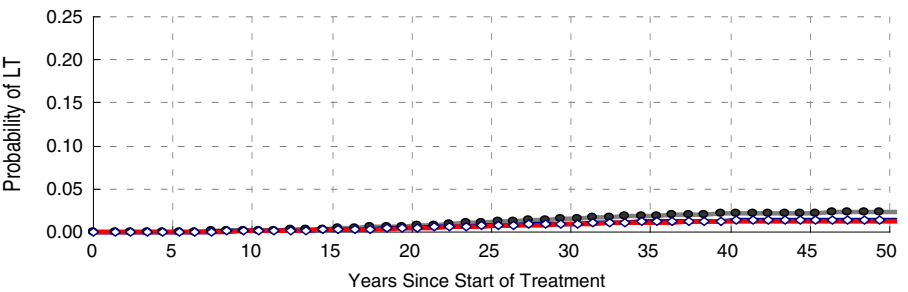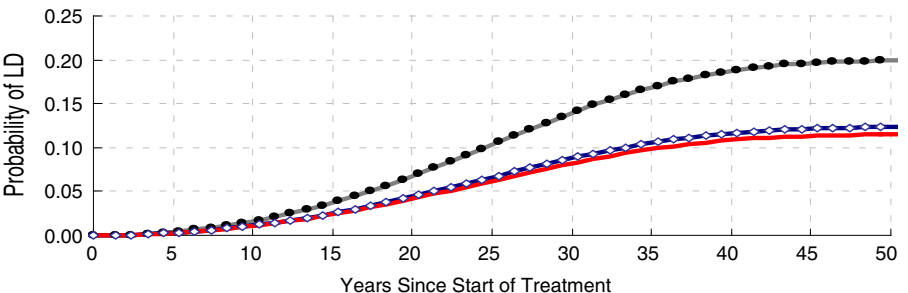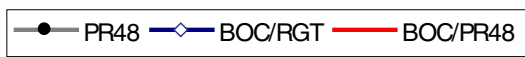

Supplement: MOESM4 [file 9444494]
